# Supplementary material
Source: Frontiers journal article supplement (https://www.frontiersin.org/articles/484010)
Supplement: Data_Sheet_2.xls [file Data_Sheet_2.xls]

## Sheet: Supplemental Table 3
Table S3. Predicted milRNAs and their characteristics.
milRNA	Chromosome	Precusor range	Frame	Distance between milRNA and miRNA* (nt)	Origin	milRNA			milRNA star		sRNA counts
						Range	Size (nt)	Sequence (5'-3')	Range	Sequence (5'-3')	Z-3639	Fgdicer1	Fgdicer2	Fgdicer1 Fgdicer2	Fgago1	Fgago2	Fgago1 Fgago2
milR-001	Chromosome_1	850146..850221	-	28	5p-arm	850196..850216	21	UUUCCGUGGACACCUCAUCCU	850150..850169	GGAUUGGGGUGUCUCCGGAG	1663	1046	26	4	3400	96	58
milR-002	Chromosome_1	2169552..2169619	-	11	3p-arm	2169557..2169579	23	UCUCGGCGAUCGGACUGACUGGC	2169589..2169612	GCCAAGUCAGACUGAACGCCGGGA	267	11	950	2	482	15	0
milR-003	Chromosome_1	2784888..2784984	-	45	5p-arm	2784958..2784979	22	UUACUGUCAAGCUCAUAUCUCU	2784892..2784914	AGAAGUAUGUAAGGUUGGCUGGUA	57	70	1	0	0	189	0
milR-004	Chromosome_1	2887138..2887194	+	15	5p-arm	2887143..2887162	20	UGUGUGUUGAUCCUUUGCCU	2887176..2887192	AGAUGAGGAAACACAUA	244	123	754	1	5	1223	35
milR-005	Chromosome_1	3232758..3232867	-	59	5p-arm	3232840..3232862	23	UACCUAUACAUCUUCGGUUUGUA	3232761..3232782	GCAAACCGAGCGAUUUGAAGG	73	5	257	0	6	314	1
milR-006	Chromosome_1	3553734..3553805	-	20	3p-arm	3553739..3553760	22	UGUUUGGAUCUCGCAGAAUUGC	3553779..3553799	UAAUUCCGUGAGGUUCAACA	121	28	273	0	5	368	4
milR-007	Chromosome_1	3581343..3581805	-	410	5p-arm	3581776..3581800	25	UCAUCUUGGUCGUAGAUAAAAUCUG	3581343..3581367	CGGAUUUUUUGAAUGACCGGGAACA	117	1	686	0	216	4	0
milR-008	Chromosome_1	3951630..3952136	+	457	5p-arm	3951635..3951656	22	UAAACGAUUCCGAACCUGCACC	3952112..3952134	GUAGAGGUCGAUAGGUUGUUUA	83	2	387	0	2	377	17
milR-009	Chromosome_1	4997661..4998167	-	456	5p-arm	4998140..4998162	23	UGAGUACUUUGACCGUUCGGCCU	4997665..4997685	GCCAGAACUGUAGGGUACUU	500	231	10	2	1166	30	24
milR-010	Chromosome_1	5391742..5391835	-	48	5p-arm	5391810..5391830	21	UAGAGAUGUUAGCUUACGCCU	5391745..5391763	AAGCGUGAGCUGACGUCUC	229	162	197	27	359	45	37
milR-011	Chromosome_1	5398835..5399082	+	195	5p-arm	5398840..5398863	24	UCGGGUUAUUAGCCGAACUCGCCU	5399057..5399080	GGGUGUGCUUGGUGGAUAGAACCU	213	174	7	1	430	10	2
milR-012	Chromosome_1	5513563..5513654	+	43	5p-arm	5513568..5513589	22	UAGGAAAGGCAGUUAACCAGGA	5513631..5513652	UCCUGGUUAGCUCACUUUCUUA	156	190	5	0	1	511	0
milR-013	Chromosome_1	5669238..5669317	-	25	5p-arm	5669289..5669312	24	UACCGGAUUUUAUGUCGAUGGCUU	5669242..5669265	GGGCAUAUUGACCAAAGAUUAUGGU	147	86	4	1	250	7	2
milR-014	Chromosome_1	5786568..5786673	+	55	5p-arm	5786573..5786595	23	UCAAGACUCAUAGAAAUUAGGGC	5786649..5786671	GCCCUAAUUUCUAUGACUCUCUA	53	37	0	0	63	61	1
milR-015	Chromosome_1	6593851..6593914	-	9	5p-arm	6593886..6593909	24	UCAAGCUGUAAGCAACUGCAACCC	6593854..6593878	GGUUGAGUUGCUGCUGGAGCAUGA	693	377	9	0	1056	18	9
milR-016	Chromosome_1	6595427..6595549	+	71	5p-arm	6595432..6595454	23	UGAGAACUUGGGCAUUGGCCGCU	6595524..6595547	AGUGGCUAACAUUUCGCGCUCUCA	314	170	8	0	581	10	0
milR-017	Chromosome_1	6621306..6621398	+	25	3p-arm	6621366..6621393	28	CUGCCAUUAUGGCCUGAACGAUGAGCCU	6621315..6621342	ACGGCUCAUCGUUCCGGCCAUAAUGGCAG	227	185	512	469	441	488	437
milR-018	Chromosome_1	7127489..7127767	-	223	3p-arm	7127494..7127516	23	AGACCUGAUAGGACUGUCACUGC	7127738..7127760	GCGGUUUGGCAGCUGUUUGGACU	302	192	3	0	491	11	7
milR-019	Chromosome_1	7128163..7128591	-	378	5p-arm	7128564..7128586	23	UCAUCACUGAAGCAUCCCGGGAG	7128166..7128187	UACCUGGUGGGUUCUUCGGUGG	72	2	47	0	132	3	0
milR-020	Chromosome_1	7138160..7138486	-	275	5p-arm	7138459..7138481	23	UCAAGCCUUGGCAUCGUUGGGCU	7138163..7138185	GCCUGAUCCGCCUGAGGCGUGA	1450	1178	67	2	2877	70	4
milR-021	Chromosome_1	7551951..7552033	+	33	3p-arm	7552007..7552028	22	UAGCAUCUGAUCUUCAUUGUGC	7551956..7551975	GACACUGAAGCAGUUGUUA	295	174	8	1	634	22	8
milR-022	Chromosome_1	7826695..7826843	+	104	5p-arm	7826700..7826720	21	UGAUUGUGGAUCUAUGUUGAA	7826823..7826841	UUCACGUAUUUCAUAUUUG	1310	893	17	2	1786	195	112
milR-023	Chromosome_1	7997079..7997159	+	30	3p-arm	7997134..7997154	21	UCGAUUUUGGCCUGGCUCUGA	7997086..7997105	CAGGUCUAGGGCAUAUCGA	122	1308	274	10	22	336	182
milR-024	Chromosome_1	7997668..7997741	+	28	5p-arm	7997673..7997693	21	UUGACUGGUCGAGAACACCGU	7997720..7997739	GCGGAGUUCUGUGGCUCGUC	148	100	422	1	3	712	0
milR-025	Chromosome_1	7998141..7998199	+	6	3p-arm	7998173..7998194	22	UAUCACCCAUGCUUCUGUAGGG	7998149..7998168	UCUUGGGGGGCAAGGGGGUG	149	10	297	0	5	282	4
milR-026	Chromosome_1	8431747..8431827	-	28	5p-arm	8431799..8431822	24	UGACUUUUCGCCGGUUUGUUGACU	8431750..8431772	UUAAUAAGGCGUGGGAGGUCA	350	179	7	0	669	15	3
milR-027	Chromosome_1	8893483..8893770	+	229	3p-arm	8893742..8893765	24	UGGCAGGUCUCUUGACGUCGGACC	8893490..8893514	GUCCGAUACCGAGAGAGUUUGUCA	2682	1397	75	4	5309	137	4
milR-028	Chromosome_1	9109861..9110049	+	137	3p-arm	9110025..9110044	20	GAGAAUACGAAUUGGCACUG	9109869..9109889	CGGUUCUACUCCUCGUAUCUC	79	29	79	12	131	10	8
milR-029	Chromosome_1	9510614..9510790	-	129	3p-arm	9510619..9510639	21	CAUACGACCAUACCUACCAGA	9510767..9510783	UCUGGUAUGUACUUGUGU	91	69	119	43	163	90	39
milR-030	Chromosome_1	10108923..10109029	-	60	5p-arm	10109004..10109024	21	AACGAAGAGUGGCCGAGUGGU	10108926..10108945	CCCUCGGCCACUCUUCGUU	140	61	120	215	232	29	199
milR-031	Chromosome_1	10109535..10109657	-	73	5p-arm	10109631..10109652	22	GAUAAGGAGUGGUCGAGCGGGA	10109538..10109559	CCUGUUCGACCGCUCCUUAUC	927	615	312	321	2302	93	238
milR-032	Chromosome_1	10302300..10302816	-	466	5p-arm	10302791..10302811	21	UCAACCAAACUCUAAGUGCCU	10302303..10302326	GCGCUUCGAGAGUCUUGUUUGA	364	161	5	1	725	25	7
milR-033	Chromosome_1	10930612..10930827	-	160	3p-arm	10930617..10930639	23	UAACGGAUUCUUUUUCUGAGCCU	10930798..10930821	GGCUGUGAGGAUAAGAACCUUUG	232	210	5	0	350	13	10
milR-034	Chromosome_1	10956535..10956737	+	150	3p-arm	10956711..10956732	22	UACGCCUCAUCGACGAUGUAGA	10956542..10956562	UUGCAAACGUCGGUAGCGUG	91	42	245	0	10	160	37
milR-035	Chromosome_1	10956880..10956935	+	7	5p-arm	10956885..10956905	21	UGACUGCCUCUCCUGUUGAGC	10956911..10956933	GCUCAAGGGGUAGGGGGAUAUUA	88	11	196	0	1	204	6
milR-036	Chromosome_1	10960375..10960504	+	77	5p-arm	10960380..10960403	24	UACCGUCGGGGUCUAAUAUACAUU	10960479..10960502	GGGUGUAAUAGUUCCCAAGGGUG	51	0	110	0	77	32	0
milR-037	Chromosome_1	10966141..10966370	+	175	3p-arm	10966344..10966365	22	UGGUGGUAGUACGCCUGAGCCU	10966149..10966170	GGGCUCAAUUUGUGCUGCACCA	99	7	300	0	279	4	1
milR-038	Chromosome_1	11023694..11023762	+	13	3p-arm	11023734..11023757	24	UCACGCGUUGGGACUUGGGUCCUU	11023702..11023722	AGGGAUCAAGCUCCGCCGCGUG	2319	105	6942	1	3693	78	2
milR-039	Chromosome_1	11188385..11188578	+	141	5p-arm	11188390..11188413	24	UGACCUUGGACUGGAUUUUGCUGA	11188553..11188576	UCAACGGAAUUGAGGACAUGGUCG	96	59	3	1	170	4	6
milR-040	Chromosome_2	280166..280286	-	76	3p-arm	280171..280188	18	CCACUGCACCACUCUUCU	280263..280280	GGAGAGUGGUGCAGUGG	110	72	26	16	207	5	10
milR-041	Chromosome_2	486581..486651	-	19	5p-arm	486625..486646	22	UAUUUGGACUGAGUAUCGACCU	486584..486607	UCGAUGGCUUUUUCUCAAAUG	141	76	3	0	273	4	2
milR-042	Chromosome_2	946612..946678	+	12	3p-arm	946652..946673	22	UCUCUCCAACGUCGACUUCUGA	946620..946641	UUGGAGGCGACUGCGGCAGAUA	67	55	4	1	118	4	3
milR-043	Chromosome_2	947168..947398	+	181	5p-arm	947173..947195	23	UCGUGGACUGGGCCUUGUUCAGG	947375..947396	CUUAUACAUGCUCAAUCUGUGA	646	375	12	1	1339	27	1
milR-044	Chromosome_2	1032539..1032617	+	29	5p-arm	1032544..1032566	23	UUUCGGAUGUCGGACGUGUGUGG	1032594..1032614	UGCACAUGUACGGUUUUCGGA	53	27	0	0	89	2	0
milR-045	Chromosome_2	1155706..1155798	-	40	5p-arm	1155770..1155793	24	UCGGCGAAGAGAACUGUGCAAGGC	1155708..1155731	GCAUUGCCGGGAGCUUUACGCUGA	295	200	8	1	581	17	1
milR-046	Chromosome_2	1161188..1161256	+	21	5p-arm	1161193..1161214	22	CGGACGAGAUCACUCAGGAGGA	1161234..1161253	UCCUCGCUGAGUACCUCGCCC	56	51	183	76	118	85	80
milR-047	Chromosome_2	1897484..1897599	-	65	3p-arm	1897489..1897509	21	UGUAGAGAUAUGAGCUUGACA	1897573..1897594	UCAAGCAACAAGUUGUUAUA	1487	1639	68	3	20	3670	15
milR-048	Chromosome_2	2528280..2528504	+	172	3p-arm	2528478..2528499	22	UACGCUGGUAGGACAUAUCACG	2528287..2528307	GUUGUGUGUCCUUUGAGCUA	255	109	858	1	5	664	16
milR-049	Chromosome_2	2831432..2831729	+	242	3p-arm	2831702..2831724	23	UCUGAAUCACGUGCACCCUGAGC	2831440..2831461	GGUCAGGCUGGAUGCGGUCUCGG	187	118	20	2	382	11	6
milR-050	Chromosome_2	2899827..2899894	+	13	3p-arm	2899867..2899889	23	UUGAGUGGGCAGGAAGCGAAUCC	2899835..2899855	GGAUUUGAAUCCAGCACCUUCG	185	1	634	0	344	8	1
milR-051	Chromosome_2	2987428..2987948	+	472	5p-arm	2987433..2987455	23	UUAGGGCACUGGAAUUUUGGCAA	2987926..2987946	UUGAUAGAAUACCAGCCCAAG	2770	1706	40	10	5616	134	78
milR-052	Chromosome_2	2993412..2993706	-	242	5p-arm	2993679..2993701	23	UGAUUAUGAGCGAGAAUCGGAUC	2993415..2993438	AUCCUAUUCCCGAUCGAGUAACG	465	286	8	1	851	25	6
milR-053	Chromosome_2	3512322..3512381	-	8	5p-arm	3512353..3512376	24	UGCACAGUAUUGUAUGCCAGACUG	3512326..3512346	UAGUCUGGCAUGGGCAGCUGGC	511	311	5	0	967	28	1
milR-054	Chromosome_2	3528634..3528739	+	56	5p-arm	3528639..3528661	23	UAUCAGCCUCGGACAUGCCGUGG	3528716..3528737	UCAGGGAAUGAGUGGGGCUGGA	178	0	144	1	277	5	0
milR-055	Chromosome_2	3528649..3528806	+	105	5p-arm	3528654..3528678	25	UGCCGUGGCGGUUGGGUUCCAGAGG	3528782..3528803	CUCUCUAAUCCGCCGUUGCGGU	83	0	72	0	158	2	0
milR-056	Chromosome_2	3599676..3600004	-	280	5p-arm	3599978..3599999	22	UAAGGUACACUGGCCUUGGCGG	3599679..3599699	CUCCAAGUCUAUGUAUUGGA	60	17	1	0	115	5	0
milR-057	Chromosome_2	4134418..4134496	+	32	5p-arm	4134423..4134443	21	UGUUGAUUGUGAGGCUGGCAC	4134474..4134494	GUGACUAAACUUGGUUCGAUG	84	64	1	0	179	5	17
milR-058	Chromosome_2	4778537..4778678	-	92	5p-arm	4778652..4778673	22	UUUUUUACAACUGUAAGCCGAA	4778540..4778561	UUCGGCUUACAGUUAUAGAAAA	359	332	18	0	1	637	1
milR-059	Chromosome_2	5099069..5099136	+	13	3p-arm	5099111..5099131	21	UACCAGAGGUGCCACCAGCGA	5099077..5099099	UUGAUGGAGGUGCCGGGUUGGUA	52	8	229	0	9	218	8
milR-060	Chromosome_2	5568968..5569444	-	420	5p-arm	5569415..5569439	25	UCUAGUUCACUGUAGAUCAACUCAG	5568971..5568996	UGGGUGGUCAAUGGUCAUGGCUAGA	268	235	2	0	500	15	5
milR-061	Chromosome_2	5985188..5985531	-	290	3p-arm	5985193..5985214	22	ACAUACGACCAUACCUACCAGA	5985503..5985524	UCAUAGUGGGUGGUGGUUUUAUG	515	335	780	205	825	480	244
milR-062	Chromosome_2	6096166..6096225	-	9	5p-arm	6096198..6096220	23	UAACUUAGACAGAACAUGGCGUC	6096168..6096190	AUGUCAGUAGUGUUCGGGGUUG	177	58	3	0	395	19	4
milR-063	Chromosome_2	6753058..6753244	-	136	5p-arm	6753218..6753239	22	UCGGUCUUGUAGCGCGGCGAGC	6753061..6753083	UUGCGGCAAGCACGAGAACGA	57	17	3	1	127	7	0
milR-064	Chromosome_2	6788107..6788344	-	182	3p-arm	6788112..6788135	24	UUCGAUUCUUGGAUAGUAAGCACC	6788316..6788337	GGCGCUUAAUAUCUUAGAAUUG	5362	2412	56	5	9702	233	20
milR-065	Chromosome_2	7519444..7519550	+	46	5p-arm	7519449..7519476	28	AUGAUGAUUUUUGAGCCCAGUUUCAAGC	7519521..7519548	GCUUGAAACUGUGCGUAGAUUUCAUUGU	178	391	16	6	439	801	456
milR-066	Chromosome_2	8043436..8043542	-	53	3p-arm	8043441..8043463	23	UAGAGUCACUCCAUCGAAUUGGG	8043515..8043537	CAAUUCGGAGGAAUGGCCUUA	72	48	3	0	125	4	0
milR-067	Chromosome_2	8164296..8164407	-	56	3p-arm	8164301..8164323	23	UAAUCGUAAUCCGAGGACUUGGC	8164378..8164400	GUCUGGCCUUGGAUUCGUGAGGA	108	37	9	0	204	9	0
milR-068	Chromosome_2	8310616..8310741	-	72	5p-arm	8310713..8310736	24	UGUUUCCGGUCUGACCUACUGACU	8310619..8310642	AAUUAGAAGGACGAAUCAGGAACA	335	161	5	0	576	10	1
milR-069	Chromosome_2	8310994..8311102	+	55	5p-arm	8310999..8311023	25	UGAUUAAGCUGUAUCAUUAUGAACC	8311077..8311100	GGUUUGUUUGAUGCAGAUUGUGCG	78	42	1	0	108	5	0
milR-070	Chromosome_2	8345470..8345568	-	48	5p-arm	8345541..8345563	23	UAAGAUUCUCUACUUCGUUCAUA	8345474..8345494	UAUGAAUAAAGCAGAGAAUCUU	538	649	7	2	36	1645	2
milR-071	Chromosome_3	464565..464665	+	42	3p-arm	464637..464660	24	UGAUGGUCUGACCUCGCUUUGCCU	464571..464596	GCAGAGUGAGGACGCAGAUCAUGA	665	462	18	0	1506	31	4
milR-072	Chromosome_3	655638..656109	+	411	3p-arm	656080..656104	25	UAAGGGUAUUGAAGUCGCCGAACCU	655646..655670	AGGUUCGGCGACUUCAAUACCCUUA	72	31	2	0	88	3	0
milR-073	Chromosome_3	754777..754868	-	39	3p-arm	754782..754805	24	UGCAGUUUGAGACUAUGCCUCUGC	754843..754864	GAAGGGUAUAUCCCAGGUUGCA	53	83	4	0	111	3	2
milR-074	Chromosome_3	786524..787002	+	425	5p-arm	786529..786552	24	UGGCGUCGUGAAUUGUGAUUUCCU	786976..787000	AGGAAAGUCGCGGGGCACGAAAUCA	170	17	3	0	286	4	0
milR-075	Chromosome_3	876053..876328	-	218	3p-arm	876058..876082	25	UAUCCAGUAGUCGACACAAAGGACA	876299..876322	UGUUGUUGGUGUUGAUCUGAGAUG	1078	618	10	5	2039	25	8
milR-076	Chromosome_3	947159..947209	+	6	5p-arm	947164..947184	21	UAGAAUCUGGUCAGUAUACCC	947189..947207	AUAUUAAAUCAUGGUUUUG	50	34	0	0	81	1	1
milR-077	Chromosome_3	3044911..3045262	+	295	3p-arm	3045235..3045257	23	UCUUCCAUGCAUUGUGUUUGGCU	3044919..3044941	GGUCGAAUUCGAGGCAUGGAAAA	57	56	1	0	145	3	7
milR-078	Chromosome_3	3825058..3825147	-	37	5p-arm	3825119..3825142	24	UAUUCCUUGCUAAUAUAGAUCGCU	3825061..3825083	AGGAGUUGAAUGAUAGCAAGGGAU	136	101	1	0	273	4	2
milR-079	Chromosome_3	3856025..3856082	-	5	3p-arm	3856030..3856050	21	UCAUUCGAUCUUUGUAGAGAU	3856054..3856075	AUCUGAAAAGAGAUAUGAAUGG	3081	3383	136	5	261	6592	177
milR-080	Chromosome_3	4119802..4119869	+	18	3p-arm	4119844..4119864	21	UGACAUUCUGGAACUGAGCCU	4119810..4119827	AGGCUGGGUUAGGAAUGU	53	40	3	1	125	8	0
milR-081	Chromosome_3	4658960..4659041	+	29	3p-arm	4659016..4659036	21	UUGCGCUGAAUCUUGGAACCC	4658968..4658988	GUGUGCUGGGAAGCAGGGCGG	57	48	3	1	125	5	1
milR-082	Chromosome_3	5053642..5053738	-	51	5p-arm	5053714..5053733	20	UAUGGCGGUGCUUUACAUCU	5053645..5053664	AGAUGUAAAGCACCAUCAUA	55	45	1	0	0	136	0
milR-083	Chromosome_3	5054359..5054451	-	47	5p-arm	5054427..5054446	20	AUCUAUCUACAUUCCUGAGC	5054363..5054381	GUUUACUGAUUGUGUUUAGA	52	50	130	108	75	125	112
milR-084	Chromosome_3	6037156..6037267	+	59	5p-arm	6037161..6037184	24	ACACAUCGCCAAAGUUUGAGAGAG	6037242..6037265	CGCUCUCAAACUUUAGCGAUGUGU	2077	1410	35	4	4593	554	387
milR-085	Chromosome_3	6546498..6547024	-	467	3p-arm	6546503..6546527	25	UAAUCUUGAUGAGACUGGGACUCGA	6546993..6547017	UCGGGAACGGUAUUCAUUACUGUUG	293	6	1122	2	607	18	0
milR-086	Chromosome_3	7114701..7115032	+	275	3p-arm	7115005..7115027	23	UCUCGGACUAGGCACAACUUCAC	7114708..7114731	UGGAGAUGAGUUUGGAGCAGAGA	79	66	1	0	138	1	3
milR-087	Chromosome_3	7538137..7538360	-	170	5p-arm	7538332..7538355	24	UAAGACUUGACAAUGACAACCCGA	7538140..7538163	UGAUGUUGUUUGUUGUUUGUUUUA	300	170	5	2	650	17	5
milR-088	Chromosome_4	435218..435649	-	382	5p-arm	435622..435644	23	UGGCACUGAGAUCAUGGUCGGGG	435221..435241	CCCCGUCGUCGUACGGUAUCA	5038	3802	106	16	9638	276	42
milR-089	Chromosome_4	570969..571048	-	22	3p-arm	570974..570998	25	UACUCGAGACCAAGCUGCCUUGCCU	571019..571041	AGGCAAGACAGCUUGAUCUUGAG	63	1	184	0	136	4	0
milR-090	Chromosome_4	571089..571216	-	72	3p-arm	571094..571117	24	UCAAGUAUGCUGUGAUCGGUCAAC	571188..571210	GCGACCACCACAGCAUACUUGA	100	0	160	0	155	7	0
milR-091	Chromosome_4	571218..571360	-	90	3p-arm	571223..571246	24	UCAAGUAUGCUGUGAUCAGUCAAC	571335..571360	UGAUCCUCCUCACAGUAUACUUGA	63	2	43	0	97	1	0
milR-092	Chromosome_4	589600..589718	+	73	5p-arm	589605..589625	21	AGCGAAGAGUGGUGCAGUGGU	589697..589716	CCACUGCCAGCUCUUCGUU	400	380	386	162	767	106	132
milR-093	Chromosome_4	590073..590183	+	67	5p-arm	590078..590097	20	CAAGGAGUGGUGUAGUGGGA	590163..590181	CCCACUGCACCCUCCUUG	121	53	42	17	292	9	21
milR-094	Chromosome_4	1084812..1084877	+	13	5p-arm	1084817..1084841	25	UGACCUUGCUGAAGUUGUACCUGGC	1084853..1084874	GCCAGGUACGCCUUCAGCAAGGC	758	483	15	3	1534	48	31
milR-095	Chromosome_4	1247904..1248233	+	282	5p-arm	1247909..1247930	22	UAUGUACUGCUCUGGGCACCGG	1248211..1248231	UGGGUGGCAGGAGGCAGCAUG	54	26	8	0	96	18	0
milR-096	Chromosome_4	1248537..1248927	+	341	5p-arm	1248542..1248564	23	UGAAUUGGCAGUCGGUCUAGGAC	1248904..1248925	GUCUUGGCUGACAGUAAGUCCA	415	192	8	0	826	14	4
milR-097	Chromosome_4	1717042..1717396	-	301	5p-arm	1717368..1717391	24	UAUUGCAAAUAUAGGGAUUCGAAC	1717045..1717068	GUUUAAAUUUAUAUAUUUAUAUUA	220	0	634	0	363	6	1
milR-098	Chromosome_4	3050814..3050947	-	77	5p-arm	3050917..3050942	26	GAGUUCAAUCCUCGCUAGGGGCACCA	3050818..3050841	UGGUGUUGUGGUUGCGGAUUGGACU	174	103	242	126	191	535	157
milR-099	Chromosome_4	3108280..3108402	-	66	5p-arm	3108372..3108397	26	UUGUUUGAGAUUACUGUUGACACACC	3108283..3108307	GGCGUGUCAACAGUAAUUUCAACGG	55	41	1	0	65	4	1
milR-100	Chromosome_4	3341725..3342174	-	401	3p-arm	3341730..3341749	20	GAAGAACUCGAGUACCUGAA	3342149..3342167	UUCAGCAACAGAGUUCCUC	58	129	3	3	199	114	292
milR-101	Chromosome_4	3369054..3369265	-	165	5p-arm	3369241..3369260	20	ACAUACGACCAAAGGUAGUG	3369057..3369077	CAUUACUCAUGAUUGUUUUGU	350	308	643	159	381	629	199
milR-103	Chromosome_4	3712569..3712703	+	85	5p-arm	3712574..3712595	22	AGACGAAAUUAGUAGAUCAGCU	3712679..3712701	GGCUGUUAUCAAGAGAUUCGUCU	101	72	4	0	122	5	3
milR-104	Chromosome_4	6267762..6268236	-	423	5p-arm	6268209..6268231	23	UGUGCUUAUCGCCGGUACCCUGA	6267765..6267787	UGGAGGUGGAGGUAUAAGCGGG	85	1	281	0	1	397	1
milR-105	Chromosome_4	6268095..6268247	-	105	5p-arm	6268221..6268242	22	UACGUUGACUGUGUGCUUAUCG	6268099..6268117	CUGAGAAGCAUCGAGCAGCGU	58	1	218	0	0	401	0
milR-107	Chromosome_4	7042113..7042179	+	15	3p-arm	7042155..7042174	20	CGGCAUUUUCUCUGCGGCCU	7042121..7042141	AGGGCGACAGCGAUGAUGACG	159	112	260	80	292	88	69
milR-108	Chromosome_4	7206871..7207254	+	334	3p-arm	7207229..7207249	21	CCAAAUGGACAAGAACUGAUU	7206879..7206896	AGUCAUUCACGUCUAUUU	171	133	295	131	199	221	146
milR-109	Chromosome_4	7212160..7212226	-	21	5p-arm	7212202..7212221	20	UGAUAAAUUGGUGUUGGUUG	7212163..7212182	CAUCCAGCGCCAAUUUAUCA	31450	21262	832	18	342	69466	60
milR-110	Chromosome_4	7212551..7212823	-	227	5p-arm	7212798..7212818	21	UCUGGCAUUGUUGUGAUGAAG	7212554..7212572	UUUCAUCACGAUAGUGCCA	36263	25316	855	16	518	67503	76
milR-111	Chromosome_4	7213156..7213330	-	118	3p-arm	7213161..7213184	24	UCAGAGCGGUGAUUGAUCAAGAUU	7213301..7213323	AAUCUUGUCAAUUAUCGGUCUGA	3735	2715	91	2	158	8023	18
milR-112	Chromosome_4	7268358..7268424	-	21	5p-arm	7268399..7268419	21	UAGGGUCUCUGACCGUGGGCC	7268362..7268379	GGCUCCAUGAAGGGACUCU	109	51	77	1	136	10	2
milR-113	Chromosome_4	7336132..7336205	+	27	5p-arm	7336137..7336157	21	CCUCUCCGGACCUCGAAACCC	7336183..7336203	GCGGUUUCGAGGCGAGGAGAGG	5324	4708	9816	11269	9907	6025	10349
milR-114	Chromosome_4	7351786..7352153	-	316	3p-arm	7351791..7351812	22	UGUUGACAGAGAAUCUCUUGGA	7352127..7352146	UCCAACAGAUUGGCUGUGGGC	695	99	1810	0	28	2197	16
